# Supplementary material
Source: PubMed Central journal article supplement (PMC11073401)
Supplement: 18_2020_3719_MOESM4_ESM.pdf [file 18_2020_3719_MOESM4_ESM.pdf]

## **Supplementary Informations**

### **Kidney inflammaging is promoted by CCR2+ macrophages and tissue-derived micro-environmental factors**

Lefèvre L, Iacovoni JS, Martini H, Bellière J, Maggiorani D, Dutaur M, Marsal DJ, Decaunes P, Pizzinat N, Mialet-Perez J, Cussac D, Parini A and V Douin-Echinard.

Cellular and Molecular Life Sciences

Corresponding authors :

Pr Angelo Parini

angelo.parini@inserm.fr

Dr Victorine Douin-Echinard

victorine.douin@inserm.fr

Institute of Metabolic and Cardiovascular Diseases, UMR1048, 31432 Toulouse, Cedex 4, France

Paul Sabatier University, 31062 Toulouse, Cedex 9, France

## **Supplementary Methods**

### **Supplementary Tables**

**Table S1**

**Table S2**

## **Supplementary Methods**

### **Histochemistry**

Kidneys were fixed for 6h in 3.4% PFA then in 70% Ethanol and included in paraffin. Tissue sections were stained with sirius red and digitized with a Hamamatsu NanoZoomer. Stained areas and total surface from each section were determined using color-based thresholding and quantified using Fiji software as previously described (1).

### **Biochemistry**

Creatinin and blood urea nitrogen (BUN) were measured in plasma samples with ABX Pentra reagents using the Pentra C400 analyzer (HORIBA Medical).

### **References**

1. Laroumanie F, *et al.* (2014) CD4+ T cells promote the transition from hypertrophy to heart failure during chronic pressure overload. *Circulation* 129(21):2111-2124.

**Table S1. List of the antibodies used for DE cyt analysis**

| name               | alternative name    | clone       | purchased from  |
|--------------------|---------------------|-------------|-----------------|
| <b>Set A</b>       |                     |             |                 |
| CD45 APC-Cy7       |                     | 30-F11      | Biologend       |
| Ly6C PB            |                     | HK1.4       | Biologend       |
| MHCII FITC         | I-A/I-E             | M5/114.15.2 | Biologend       |
| CCR2 PE            |                     | FAB5538     | R&D Systems     |
| CD14<br>PercPCy5.5 |                     | Sa-2-8      | eBioscience     |
| CD64 APC           | Fc gamma RI         | X54-5/7.1   | Biologend       |
| <b>Set B</b>       |                     |             |                 |
| Sca-1 PB           | Ly6A/E              | D7          | Biologend       |
| CD31<br>PercPCy5.5 | PECAM1              | 390         | Biologend       |
| CD45 APC-Cy7       |                     | 30-F11      | Biologend       |
| CD326 FITC         | EpCAM               | G8.8        | Biologend       |
| mEFSK4 PE          | anti-Feeder Cells   | mEF-SK4     | Miltenyi Biotec |
| CD73 PE-Cy7        | 5'ecto-nucleotidase | TY/11.8     | Biologend       |
| CD140b APC         | PDGFR $\beta$       | APB5        | Biologend       |

**Table S2. Sequences of the primers used for RT-QPCR**

| gene          | Primer sequences (5' -> 3')                                | Ref_Seq        |
|---------------|------------------------------------------------------------|----------------|
| <i>Nt5e</i>   | F: CTTCATGAACATCCTGGGCT<br>R: AACGTTTCTGAGGAGGGGAT         | NM_011851      |
| <i>Cdkn1c</i> | F: ATCACCAATCAGCCAGCAGAA<br>R: CTACGCGCTATCACTGGGAAG       | NM_009876.4    |
| <i>Cdkn2c</i> | F: GGGGGACCTAGAGCAACTTAC<br>R: CTCCGGATTTCCAAGTTTCA        | NM_007671.2    |
| <i>Cx3cl1</i> | F: TGGCTTTGCTCATCCGCTATCAG<br>R: CGTCTGTGCTGTGTCGTCTCC     | NM_009142.3    |
| <i>Cxcl2</i>  | F: CGCTGTCAATGCCTGAAG<br>R: GCGGTCACACTCAAGCTCT            | NM_009140.2    |
| <i>Ccl2</i>   | F: AACCTGGATCGGAACCAAAT<br>R: TACGGGTCAACTTCACATTCAA       | NM_011333.3    |
| <i>Il6</i>    | F: GAGGATACCACTCCCAACAGACC<br>R: AAGTGCATCATCGTTGTTTCATACA | NM_031168      |
| <i>Il1a</i>   | F: TTGGTTAAATGACCTGCAACA<br>R: GAGCGCTCACGAACAGTTG         | NM_010554.4    |
| <i>Il10</i>   | F: TTCAGCCAGGTGAAGACTTTCT<br>R: GCTTGGCAACCCAAGTAACC       | NM_010548.2    |
| <i>Tgfb1</i>  | F: AGGGCTACCATGCCAACTTCT<br>R: CCGGGTTGTGTTGGTTGTAGA       | NM_011577.2    |
| <i>Vegfa</i>  | F: CAGCAGATGTGAATGCAGACCAA<br>R: CTTTCTCCGCTCTGAACAAGGC    | NM_001025250.3 |
| <i>Cxcl12</i> | F: CTCAACTCCAACTGTGCC<br>R: TTGGGCTGTTGTGCTTACTTG          | NM_021704.3    |
| <i>Cxcr4</i>  | F: CCATGGAACCGATCAGTGTGA<br>R: CAGGGTTCCTTGTGGAGTCA        | NM_009911.3    |
| <i>Igf1</i>   | F: GCTCTTCAGTTCGTGTGTGGAC<br>R: AGCCTGTGGGCTTGTGAAGTA      | NM_010512.4    |
| <i>Ccr2</i>   | F: CTTGGGAATGAGTAACTGTGTGA<br>R: AATGACAGGATTAATGCAGCAGTGT | NM_009915.2    |
| <i>Tnfa</i>   | F: AGCCGATTTGCTATCTCATACCA<br>R: GGGCTCATACCAGGGTTTGA      | NM_013693      |
| <i>Il1b</i>   | F: CTGCACTACAGGCTCCGAGAT<br>R: TGTTGGTTGATATTCTGTCCATTG A  | NM_008361.4    |
| <i>Il12b</i>  | F: CGGACGGTTCACGTGCTC<br>R: CACATGTCCTGCCCCGAGAGT          | NM_001303244.1 |

|               |                                                       |                               |
|---------------|-------------------------------------------------------|-------------------------------|
| <i>Cdkn2a</i> | F: CCGAACTCTTTCGGTCGTACCC<br>R: CTGCTACGTGAACGTTGCCCA | NM_001040654.1                |
| <i>Rplp0</i>  | F: GCTTCATTGTGGGAGCAGAC<br>R: ATGGTGTTCTTGCCCATCAG    | NM_007475.5                   |
| <i>Trp53</i>  | F: TCCTGGCTGTAGGTAGCGACT<br>R: ATCCGACTGTGACTCCTCCAT  | NM_001127233.1<br>NM_011640.3 |
